# Supplementary material for: Structural and Dynamic Behaviour of Heterocycles Derived from Ethylenediamines with Formaldehyde: 1,3,5-Triazinanes and Bis(imidazolidinyl)methanes
Source: MDPI journal article supplement (doi:10.3390/org4020024), 2023-06-15
Supplement: s1 [file s1]

# The versatility of formaldehyde in the synthesis of 1,3,5-triazinanes and bis(imidazolidinyl)methanes

Raúl Colorado-Peralta <sup>1,2,\*</sup>, Sonia A. Sánchez-Ruiz <sup>1</sup> and Angelina Flores-Parra <sup>1,\*</sup>

<sup>1</sup> Departamento de Química, Centro de Investigación y de Estudios Avanzados del IPN, Av. Instituto Politécnico Nacional 2508, Col. San Pedro Zacatenco, Del. Gustavo A. Madero, C.P. 07360, CDMX, Méx.

<sup>2</sup> Facultad de Ciencias Químicas, Universidad Veracruzana, Oriente 6 1009, Col. Rafael Alvarado, C.P. 94340, Orizaba, Ver., Méx.

\* Correspondence: [racolorado@uv.mx](mailto:racolorado@uv.mx) (R.C.-P.); [aflores@cinvestav.mx](mailto:aflores@cinvestav.mx) (A.F.-P.)

**Table S1.** Crystallographic data for compound 3.

| Crystal data                                                                                                            |                                                           |
|-------------------------------------------------------------------------------------------------------------------------|-----------------------------------------------------------|
| Chemical formula                                                                                                        | C <sub>24</sub> H <sub>27</sub> N <sub>3</sub>            |
| <i>M<sub>r</sub></i>                                                                                                    | 357.48                                                    |
| Crystal system, space group                                                                                             | Monoclinic, <i>P</i> 2 <sub>1</sub> / <i>n</i>            |
| Temperature (K)                                                                                                         | 293                                                       |
| <i>a</i> , <i>b</i> , <i>c</i> (Å)                                                                                      | 18.0674 (7), 6.1252 (3), 19.8149 (9)                      |
| $\beta$ (°)                                                                                                             | 108.863 (2)                                               |
| <i>V</i> (Å <sup>3</sup> )                                                                                              | 2075.08 (16)                                              |
| <i>Z</i>                                                                                                                | 4                                                         |
| Radiation type                                                                                                          | Mo <i>K</i> $\alpha$                                      |
| $\mu$ (mm <sup>-1</sup> )                                                                                               | 0.07                                                      |
| Crystal size (mm)                                                                                                       | 0.2 × 0.2 × 0.2                                           |
| Data collection                                                                                                         |                                                           |
| Diffractometer                                                                                                          | KappaCCD                                                  |
| Absorption correction                                                                                                   | —                                                         |
| No. of measured, independent and observed reflections                                                                   | 7895, 4653, 1546<br>[ <i>I</i> > 2 $\sigma$ ( <i>I</i> )] |
| <i>R</i> <sub>int</sub>                                                                                                 | 0.061                                                     |
| (sin $\theta/\lambda$ ) <sub>max</sub> (Å <sup>-1</sup> )                                                               | 0.652                                                     |
| Refinement                                                                                                              |                                                           |
| <i>R</i> [ <i>F</i> <sup>2</sup> > 2 $\sigma$ ( <i>F</i> <sup>2</sup> )], <i>wR</i> ( <i>F</i> <sup>2</sup> ), <i>S</i> | 0.123, 0.429, 1.16                                        |
| No. of reflections                                                                                                      | 4653                                                      |
| No. of parameters                                                                                                       | 272                                                       |
| No. of restraints                                                                                                       | 9                                                         |
| H-atom treatment                                                                                                        | H-atom parameters constrained                             |
| $\Delta\rho_{\text{max}}$ , $\Delta\rho_{\text{min}}$ (e Å <sup>-3</sup> )                                              | 0.67, -0.30                                               |

**Table S2.** Selected bond distances (Å) and bond angles (°) for the compound 3.

| Bond lengths (Å) |                   |
|------------------|-------------------|
| C2—N3 1.444 (5)  | C11—C12 1.226 (8) |
| C2—N1 1.514 (6)  | C21—C22 1.500 (7) |
| C181—C171 1.39   | C12—C13 1.331 (8) |
| C4—N5 1.418 (6)  | C22—C23 1.39      |
| C4—N3 1.472 (6)  | C22—C27 1.39      |
| C6—N5 1.459 (6)  | C141—N3 1.340 (9) |

|                        |                           |
|------------------------|---------------------------|
| C6—N1 1.508 (7)        | C23—C24 1.39              |
| C7—N1 1.451 (6)        | C141—C151 1.511 (10)      |
| C7—C8 1.470 (8)        | C24—C25 1.39              |
| C19—C18 1.39           | C151—C201 1.39            |
| C8—C13 1.381 (7)       | C25—C26 1.39              |
| C8—C9 1.502 (8)        | C151—C161 1.39            |
| C17—C16 1.39           | C201—C191 1.39            |
| C9—C10 1.368 (9)       | C26—C27 1.39              |
| C10—C11 1.312 (10)     | C191—C181 1.39            |
| Bond angles (°)        |                           |
| N3—C2—N1 111.3 (3)     | C24—C23—C22 120           |
| C171—C161—C151 120     | C12—C13—C8 120.9 (6)      |
| N3—C14—C15 112.4 (9)   | C23—C24—C25 120           |
| N5—C4—N3 113.9 (4)     | N3—C141—C151 117.9 (8)    |
| C19—C20—C15 120        | C26—C25—C24 120           |
| N5—C6—N1 113.0 (4)     | C27—C26—C25 120           |
| C20—C19—C18 120        | C201—C151—C161 120        |
| C17—C18—C19 120        | C26—C27—C22 120           |
| N1—C7—C8 112.2 (5)     | C201—C151—C141 126.3 (14) |
| C16—C17—C18 120        | C161—C151—C141 113.7 (14) |
| C17—C16—C15 120        | C151—C201—C191 120        |
| C13—C8—C7 127.9 (6)    | C7—N1—C6 110.7 (4)        |
| C16—C15—C20 120        | C7—N1—C2 115.1 (4)        |
| C13—C8—C9 114.4 (5)    | C6—N1—C2 102.9 (5)        |
| C16—C15—C14 112.7 (16) | C181—C191—C201 120        |
| C7—C8—C9 117.8 (6)     | C141—N3—C2 115.2 (5)      |
| C20—C15—C14 127.3 (16) | C14—N3—C2 123.6 (5)       |
| C10—C9—C8 116.6 (5)    | C141—N3—C4 121.8 (5)      |
| N5—C21—C22 116.4 (5)   | C191—C181—C171 120        |
| C11—C10—C9 121.0 (6)   | C14—N3—C4 114.2 (5)       |
| C12—C11—C10 123.4 (8)  | C2—N3—C4 109.8 (4)        |
| C23—C22—C27 120        | C21—N5—C4 116.3 (4)       |
| C23—C22—C21 118.6 (5)  | C161—C171—C181 120        |
| C27—C22—C21 121.4 (5)  | C21—N5—C6 115.0 (5)       |
| C11—C12—C13 123.6 (8)  | C4—N5—C6 110.9 (4)        |

**Table S3.** Crystallographic data for compound **4** (orthorhombic polymorph).

| Crystal data                       |                                                                     |
|------------------------------------|---------------------------------------------------------------------|
| Chemical formula                   | C <sub>17</sub> H <sub>20</sub> N <sub>2</sub> S                    |
| <i>M<sub>r</sub></i>               | 284.41                                                              |
| Crystal system, space group        | Orthorhombic, <i>P</i> 2 <sub>1</sub> 2 <sub>1</sub> 2 <sub>1</sub> |
| Temperature (K)                    | 293                                                                 |
| <i>a</i> , <i>b</i> , <i>c</i> (Å) | 5.8326 (2), 16.3498 (5), 16.4816 (6)                                |
| <i>V</i> (Å <sup>3</sup> )         | 1571.72 (9)                                                         |
| <i>Z</i>                           | 4                                                                   |
| Radiation type                     | Mo <i>K</i> α                                                       |
| <i>μ</i> (mm <sup>-1</sup> )       | 0.20                                                                |

|                                                                            |                                           |
|----------------------------------------------------------------------------|-------------------------------------------|
| Crystal size (mm)                                                          | 0.25 × 0.13 × 0.08                        |
| Data collection                                                            |                                           |
| Diffractometer                                                             | KappaCCD                                  |
| Absorption correction                                                      | –                                         |
| No. of measured, independent and observed reflections                      | 12512, 3443, 1784<br>[ $I > 2\sigma(I)$ ] |
| $R_{\text{int}}$                                                           | 0.122                                     |
| $(\sin \theta/\lambda)_{\text{max}}$ (Å <sup>-1</sup> )                    | 0.659                                     |
| Refinement                                                                 |                                           |
| $R[F^2 > 2\sigma(F^2)]$ , $wR(F^2)$ , $S$                                  | 0.054, 0.154, 0.93                        |
| No. of reflections                                                         | 3443                                      |
| No. of parameters                                                          | 181                                       |
| H-atom treatment                                                           | H-atom parameters constrained             |
| $\Delta\rho_{\text{max}}$ , $\Delta\rho_{\text{min}}$ (e Å <sup>-3</sup> ) | 0.31, -0.30                               |

**Table S4.** Selected bond distances (Å) and bond angles (°) for the compound **4** (orthorhombic polymorph).

| Bond lengths (Å)      |                       |
|-----------------------|-----------------------|
| C9–C11 1.385 (5)      | N5–C6 1.439 (6)       |
| C15–C14 1.366 (6)     | N5–C4 1.455 (5)       |
| C9–C12 1.389 (5)      | N5–C7 1.467 (5)       |
| C9–C8 1.516 (5)       | C8–N3 1.463 (5)       |
| C14–C13 1.379 (6)     | S1–C6 1.837 (5)       |
| C11–C13 1.380 (6)     | S1–C2 1.834 (4)       |
| C10–C17 1.369 (6)     | N3–C2 1.442 (6)       |
| C16–C19 1.388 (7)     | C12–C15 1.376 (6)     |
| C10–C16 1.373 (6)     | N3–C4 1.460 (5)       |
| C10–C7 1.515 (6)      | C20–C19 1.373 (7)     |
| C18–C17 1.379 (7)     | C20–C18 1.374 (7)     |
| Bond angles (°)       |                       |
| C11–C9–C12 118.1 (4)  | N3–C8–C9 111.7 (3)    |
| C11–C9–C8 120.3 (3)   | C6–S1–C2 93.3 (2)     |
| C12–C9–C8 121.6 (4)   | C2–N3–C4 111.3 (4)    |
| C10–C16–C19 121.1 (5) | C2–N3–C8 113.4 (3)    |
| C13–C11–C9 121.2 (4)  | C4–N3–C8 115.1 (4)    |
| C20–C18–C17 119.9 (5) | C15–C12–C9 120.6 (4)  |
| C17–C10–C16 118.5 (4) | N3–C2–S1 113.9 (3)    |
| C17–C10–C7 119.9 (4)  | N5–C7–C10 111.8 (3)   |
| C16–C10–C7 121.7 (4)  | N3–C4–N5 118.5 (3)    |
| C10–C17–C18 121.2 (5) | C19–C20–C18 119.6 (5) |
| C6–N5–C4 112.0 (4)    | C14–C15–C12 120.7 (4) |
| C6–N5–C7 113.5 (3)    | N5–C6–S1 114.0 (3)    |
| C4–N5–C7 116.9 (4)    | C15–C14–C13 119.8 (4) |
| C16–C19–C20 119.6 (5) | C14–C13–C11 119.6 (4) |

**Table S5.** Crystallographic data for compound **4** (monoclinic polymorph).

| Crystal data |
|--------------|
|--------------|

|                                                                                                                 |                                                  |
|-----------------------------------------------------------------------------------------------------------------|--------------------------------------------------|
| Chemical formula                                                                                                | C <sub>17</sub> H <sub>20</sub> N <sub>2</sub> S |
| <i>M<sub>r</sub></i>                                                                                            | 284.41                                           |
| Crystal system, space group                                                                                     | Monoclinic, <i>P</i> 2 <sub>1</sub>              |
| Temperature (K)                                                                                                 | 293                                              |
| <i>a</i> , <i>b</i> , <i>c</i> (Å)                                                                              | 5.8447 (2), 16.3441 (5), 16.5135 (6)             |
| $\beta$ (°)                                                                                                     | 94.15                                            |
| <i>V</i> (Å <sup>3</sup> )                                                                                      | 1573.33 (9)                                      |
| <i>Z</i>                                                                                                        | 4                                                |
| Radiation type                                                                                                  | Mo <i>K</i> α                                    |
| $\mu$ (mm <sup>-1</sup> )                                                                                       | 0.20                                             |
| Crystal size (mm)                                                                                               | 0.25 × 0.13 × 0.08                               |
| Data collection                                                                                                 |                                                  |
| Diffractometer                                                                                                  | KappaCCD                                         |
| Absorption correction                                                                                           | –                                                |
| No. of measured, independent and observed reflections                                                           | 5667, 5667, 3651<br>[ <i>I</i> > 2σ( <i>I</i> )] |
| <i>R</i> <sub>int</sub>                                                                                         | 0.049                                            |
| (sin $\theta/\lambda$ ) <sub>max</sub> (Å <sup>-1</sup> )                                                       | 0.651                                            |
| Refinement                                                                                                      |                                                  |
| <i>R</i> [[ <i>F</i> <sup>2</sup> > 2σ( <i>F</i> <sup>2</sup> )], <i>wR</i> ( <i>F</i> <sup>2</sup> ), <i>S</i> | 0.065, 0.163, 1.08                               |
| No. of reflections                                                                                              | 5667                                             |
| No. of parameters                                                                                               | 361                                              |
| No. of restraints                                                                                               | 1                                                |
| H-atom treatment                                                                                                | H-atom parameters constrained                    |
| Δρ <sub>max</sub> , Δρ <sub>min</sub> (e Å <sup>-3</sup> )                                                      | 0.36, -0.43                                      |

**Table S6.** Selected bond distances (Å) and bond angles (°) for the compound **4** (monoclinic polymorph).

| Bond lengths (Å)  |                    |
|-------------------|--------------------|
| S1—C35 1.840 (6)  | N1—C27 1.495 (7)   |
| S2—C32 1.793 (7)  | C3—C4 1.368 (8)    |
| S1—C33 1.889 (7)  | C21—C22 1.388 (8)  |
| S2—C31 1.834 (6)  | C21—C20 1.418 (8)  |
| C18—C19 1.388 (8) | C21—C28 1.505 (8)  |
| C2—C1 1.355 (7)   | N2—C32 1.419 (7)   |
| C18—C17 1.419 (7) | N2—C30 1.455 (7)   |
| C2—C3 1.384 (8)   | N2—C26 1.526 (7)   |
| C18—C29 1.526 (8) | N3—C28 1.413 (7)   |
| C2—C27 1.509 (8)  | N3—C33 1.454 (8)   |
| N4—C29 1.430 (6)  | N3—C34 1.459 (7)   |
| C5—C4 1.351 (8)   | C8—C9 1.340 (8)    |
| N4—C35 1.463 (7)  | C22—C23 1.397 (10) |
| C5—C6 1.366 (8)   | C8—C7 1.360 (8)    |
| N4—C34 1.488 (7)  | C8—C26 1.523 (8)   |
| C17—C16 1.392 (8) | C7—C13 1.399 (10)  |
| C6—C1 1.369 (8)   | C23—C24 1.401 (11) |
| C14—C19 1.399 (8) | C9—C10 1.391 (9)   |

|                       |                       |
|-----------------------|-----------------------|
| C31—N1 1.425 (7)      | C11—C13 1.331 (10)    |
| C14—C15 1.407 (8)     | C11—C10 1.359 (10)    |
| C16—C15 1.370 (8)     | C20—C25 1.376 (9)     |
| N1—C30 1.443 (7)      | C25—C24 1.394 (10)    |
| Bond angles (°)       |                       |
| C35—S1—C33 91.2 (3)   | C32—N2—C30 110.4 (5)  |
| C32—S2—C31 94.6 (3)   | C32—N2—C26 115.0 (4)  |
| C19—C18—C17 118.8 (5) | C30—N2—C26 117.6 (4)  |
| C1—C2—C3 117.9 (5)    | C28—N3—C33 112.5 (5)  |
| C19—C18—C29 118.2 (5) | C5—C4—C3 118.7 (5)    |
| C1—C2—C27 119.9 (5)   | C28—N3—C34 115.9 (5)  |
| C17—C18—C29 123.0 (5) | C33—N3—C34 113.3 (5)  |
| C3—C2—C27 122.2 (5)   | C21—C22—C23 119.0 (6) |
| C29—N4—C35 111.1 (4)  | C2—C1—C6 118.9 (5)    |
| C4—C5—C6 118.7 (5)    | N4—C35—S1 116.0 (4)   |
| C29—N4—C34 116.2 (5)  | C9—C8—C7 117.3 (6)    |
| C35—N4—C34 113.0 (5)  | C9—C8—C26 119.1 (5)   |
| C16—C17—C18 122.0 (5) | C7—C8—C26 123.6 (5)   |
| C5—C6—C1 123.0 (5)    | C8—C7—C13 123.2 (6)   |
| C19—C14—C15 121.2 (5) | N3—C34—N4 116.7 (4)   |
| N1—C31—S2 111.5 (4)   | N1—C30—N2 119.9 (4)   |
| C15—C16—C17 118.6 (5) | C22—C23—C24 120.5 (7) |
| C18—C19—C14 119.0 (5) | C8—C9—C10 120.1 (6)   |
| C31—N1—C30 109.8 (5)  | N3—C33—S1 116.2 (4)   |
| C31—N1—C27 115.9 (4)  | C8—C26—N2 112.4 (4)   |
| C30—N1—C27 113.5 (4)  | N3—C28—C21 110.5 (5)  |
| C22—C21—C20 119.4 (6) | C13—C11—C10 119.2 (7) |
| C4—C3—C2 122.8 (5)    | C11—C13—C7 118.5 (7)  |
| C22—C21—C28 120.2 (5) | C25—C20—C21 122.1 (6) |
| C20—C21—C28 120.5 (5) | N2—C32—S2 112.6 (4)   |
| C16—C15—C14 120.4 (5) | C20—C25—C24 117.8 (7) |
| N1—C27—C2 109.9 (4)   | C25—C24—C23 121.2 (7) |
| N4—C29—C18 113.5 (4)  | C11—C10—C9 121.7 (7)  |
